# Supplementary material for: Efficacy of Platelet-Rich Plasma in Women with a History of Embryo Transfer Failure: A Systematic Review and Meta-Analysis with Trial Sequential Analysis
Source: MDPI journal article supplement (doi:10.3390/bioengineering10030303), 2023-02-27
Supplement: s1 [file s1]

**Table S1.** Outcome definitions and time of measurement.

| Study                   | Time of Measurement   | Definition                                                                                                                                                                       |
|-------------------------|-----------------------|----------------------------------------------------------------------------------------------------------------------------------------------------------------------------------|
| Allahveisi et al., 2020 | Implantation rate     | dividing the number of the observed embryonic sacs in the 6-week-old sonogram by the number of the transferred embryos.                                                          |
|                         | Biochemical pregnancy | NA                                                                                                                                                                               |
|                         | Clinical pregnancy    | The rate of clinical pregnancy was recorded by dividing the number of fetal poles with an observed heartbeat in the 6-week-old sonogram by the number of the transferred embryos |
|                         | Live birth rate       | 24 weeks of gestation was considered as live birth                                                                                                                               |
|                         | Miscarriage rate      | NA                                                                                                                                                                               |
| Eftekhari et al., 2018  | Implantation rate     | The ratio of gestational sacs to the number of embryos transferred                                                                                                               |
|                         | Biochemical pregnancy | The chemical pregnancy was defined as serum B-hCG $\geq 50$ IU/L after 14 days from embryo transfer.                                                                             |
|                         | Clinical pregnancy    | The clinical pregnancy as the presence of a gestational sac with heartbeat identified by ultrasound 5 weeks after the embryo transfer                                            |
|                         | Live birth rate       | pregnancy as pregnancy continued after 20 weeks                                                                                                                                  |
|                         | Miscarriage rate      | The abortion rate as clinically recognized pregnancy losses before 20 weeks of gestation                                                                                         |
| Ershadi et al., 2022    | Implantation rate     | NA                                                                                                                                                                               |
|                         | Biochemical pregnancy | Chemical pregnancy was detected using positive serum $\beta$ -HCG levels 2 weeks after the embryo transfer.                                                                      |
|                         | Clinical pregnancy    | Clinical pregnancy was detected by the presence of a heart rate on transvaginal ultrasound 5 weeks after the embryo transfer                                                     |
|                         | Live birth rate       | NA                                                                                                                                                                               |
|                         | Miscarriage rate      | NA                                                                                                                                                                               |
| Nazari et al., 2020     | Implantation rate     | NA                                                                                                                                                                               |
|                         | Biochemical pregnancy | Chemical pregnancy and clinical pregnancy were determined by positive serum b-HCG, 2 weeks after embryo transfer                                                                 |
|                         | Clinical pregnancy    | The presence of fetal heartbeat in transvaginal ultrasound 5 weeks after embryo transfer.                                                                                        |
|                         | Live birth rate       | Definition not available                                                                                                                                                         |
|                         | Miscarriage rate      | NA                                                                                                                                                                               |
| Nazari et al., 2019     | Implantation rate     | NA                                                                                                                                                                               |
|                         | Biochemical pregnancy | serum $\beta$ HCG 2 weeks after embryo transfer                                                                                                                                  |
|                         | Clinical pregnancy    | The presence of fetal heartbeat in transvaginal ultrasound 5 weeks after embryo transfer                                                                                         |
|                         | Live birth rate       | NA                                                                                                                                                                               |
|                         | Miscarriage rate      | NA                                                                                                                                                                               |
| Nazari et al., 2021     | Implantation rate     | NA                                                                                                                                                                               |
|                         | Biochemical pregnancy | positive serum $\beta$ -hCG after 2 weeks from the day of embryo transfer                                                                                                        |
|                         | Clinical pregnancy    | the presence of fetal heartbeat in transvaginal ultrasound after 6 weeks from the day of ET                                                                                      |
|                         | Live birth rate       | Definition not available                                                                                                                                                         |

|                        |                       |                                                                                                                |
|------------------------|-----------------------|----------------------------------------------------------------------------------------------------------------|
| Nazari et al., 2022    | Miscarriage rate      | NA                                                                                                             |
|                        | Implantation rate     | NA                                                                                                             |
|                        | Biochemical pregnancy | NA                                                                                                             |
|                        | Clinical pregnancy    | Clinical pregnancy was defined by the presence of an embryonic sac at 5-6 weeks gestation.                     |
|                        | Live birth rate       | Live birth was defined as birth after 24 weeks of gestation                                                    |
|                        | Miscarriage rate      | Spontaneous abortion was defined by the loss of pregnancy before 20 weeks of gestation                         |
| Obidniak et al., 2017  | Implantation rate     | Definition not available                                                                                       |
|                        | Biochemical pregnancy | Definition not available                                                                                       |
|                        | Clinical pregnancy    | Definition not available                                                                                       |
|                        | Live birth rate       | Definition not available                                                                                       |
|                        | Miscarriage rate      | Not definition available                                                                                       |
| Zamaniyan et al., 2020 | Implantation rate     | Number of gestational sacs on ultrasound per the total number of embryos transferred into the uterine cavity   |
|                        | Biochemical pregnancy | Serum b-HCG two weeks after frozen-thawed embryo transfer                                                      |
|                        | Clinical pregnancy    | The presence of fetal heartbeat in transvaginal ultrasonography five weeks after frozen-thawed embryo transfer |
|                        | Live birth rate       | NA                                                                                                             |
|                        | Miscarriage rate      | Definition not available                                                                                       |
| Zargar et al., 2021    | Implantation rate     | Definition not available                                                                                       |
|                        | Biochemical pregnancy | NA                                                                                                             |
|                        | Clinical pregnancy    | Definition not available                                                                                       |
|                        | Live birth rate       | The delivery of a live born child after 24 weeks of gestational age                                            |
|                        | Miscarriage rate      | Definition not available                                                                                       |
| NA: Not applied.       |                       |                                                                                                                |

**Table S2.** Excluded studies (with reasons).

| Study                        | Reason for Exclusion           | Reference |
|------------------------------|--------------------------------|-----------|
| Chang et al., 2015           | No control group               | [1]       |
| Tandulwadkar et al., 2017    | No control group               | [2]       |
| Zadehmodarres et al., 2017   | No control group               | [3]       |
| Colombo et al., 2017         | No clinical trial              | [4]       |
| Molina et al., 2018          | No randomized trial            | [5]       |
| Wang et al., 2018            | Inappropriate intervention arm | [6]       |
| Coksuer et al., 2019         | Retrospective study            | [7]       |
| Kim et al., 2019             | No controlled arm              | [8]       |
| Chang et al., 2019           | No randomized trial            | [9]       |
| Aghajanzadeh et al., 2020    | No controlled arm              | [10]      |
| Maleki-Hajiagha et al., 2020 | Systematic review              | [11]      |
| Frantz et al., 2020          | No controlled arm              | [12]      |
| Tehranejad et al., 2020      | No randomized trial            | [13]      |
| Godha et al., 2019           | Insufficient data              | [14]      |

## A

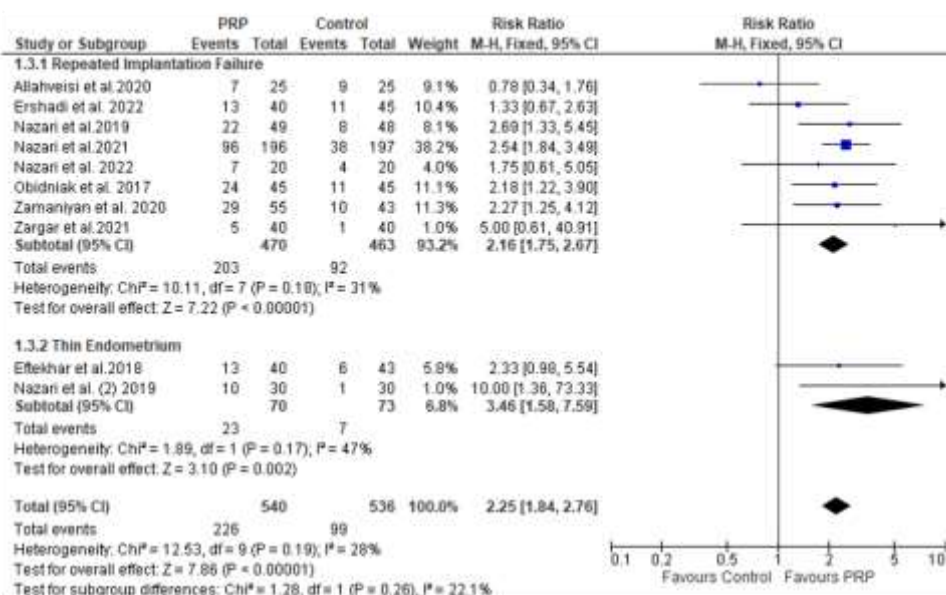

## B

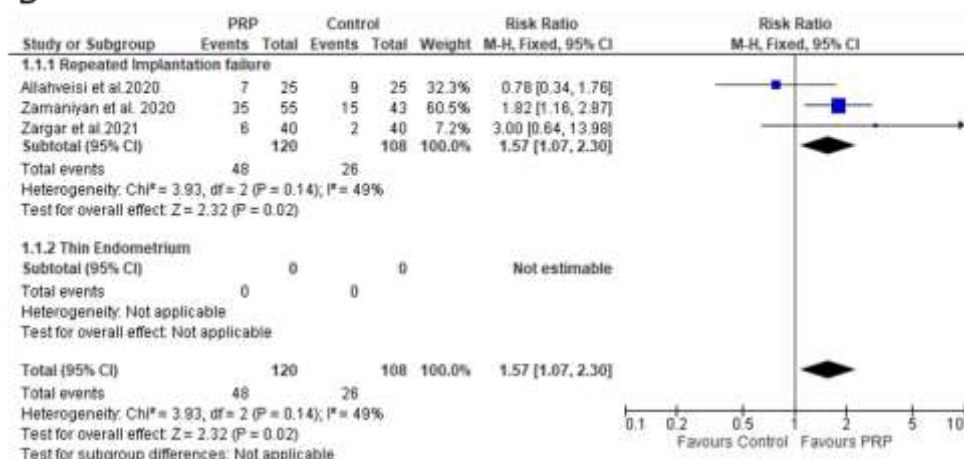

## C

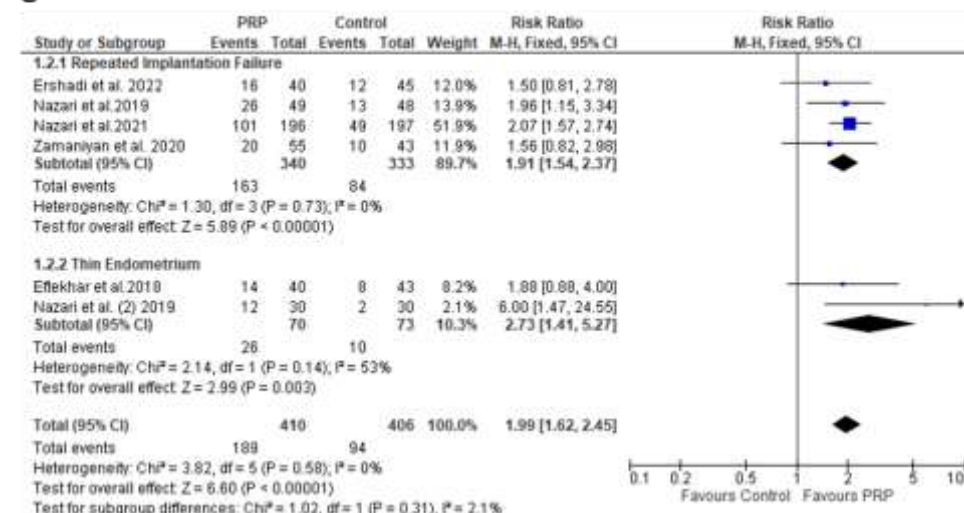

D

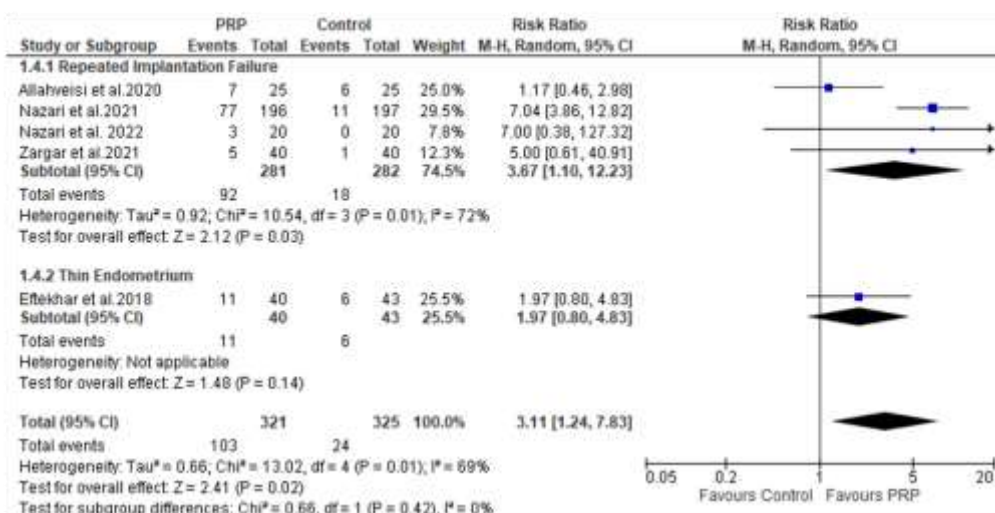

E

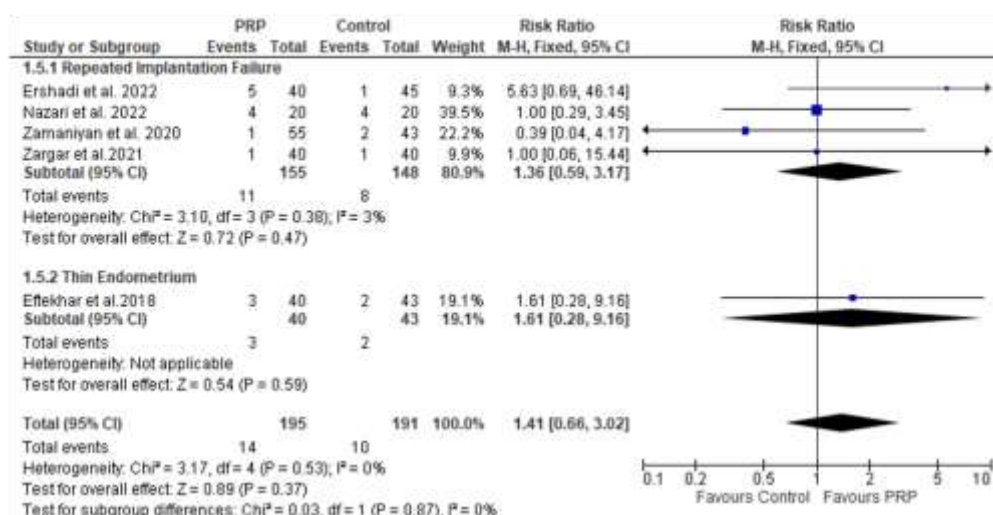

**Figure S1.** Meta-analysis of all studies (not excluding high-risk bias studies) evaluating (A) clinical pregnancy rate, (B) implantation rate, (C) biochemical pregnancy rate, (D) live-birth rate, and (E) miscarriage rate. CI: confidence interval; PRP: platelet-rich plasma.

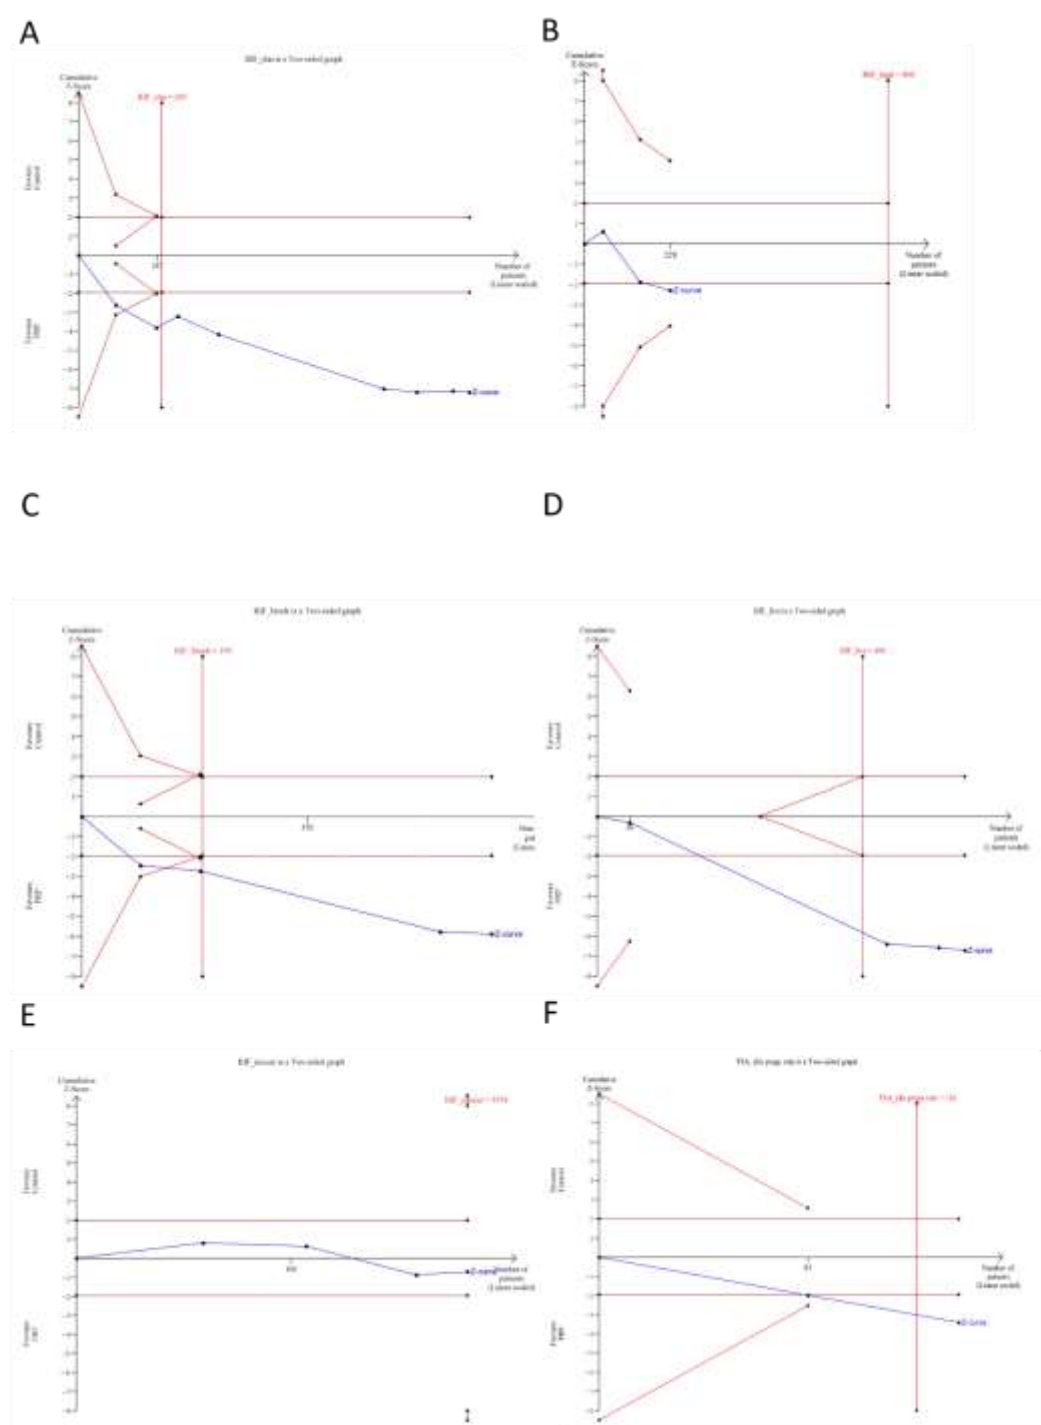

**Figure S2.** Trial sequential analysis for (A) clinical pregnancy rate, (B) implantation pregnancy rate, (C) biochemical pregnancy rate, (D) live-birth rate and (E) miscarriage rate in Recurrent Implantation Failure (RIF) studies. Trial sequential analysis for (F) clinical pregnancy in Thin Endometrium (TE) studies.

**Table S3.** Summary of the quality assessment by GRADE approach of outcomes included in the meta-analysis of Repeated Implantation Failure patients.

| Certainty Assessment       |                   |              |                      |              |                           |                      | № of Patients   |                        | Effect                  |                                               | Certainty           | Importance |
|----------------------------|-------------------|--------------|----------------------|--------------|---------------------------|----------------------|-----------------|------------------------|-------------------------|-----------------------------------------------|---------------------|------------|
| № of Studies               | Study design      | Risk of Bias | Inconsistency        | Indirectness | Imprecision               | Other Considerations | PRP             | Conventional Treatment | Relative (95% CI)       | Absolute (95% CI)                             |                     |            |
| Implantation rate          |                   |              |                      |              |                           |                      |                 |                        |                         |                                               |                     |            |
| 3                          | randomised trials | not serious  | not serious          | not serious  | very serious <sup>a</sup> | none                 | 48/120 (40.0%)  | 26/108 (24.1%)         | RR 1.57 (1.07 to 2.30)  | 137 more per 1000 (from 17 more to 313 more)  | ⊕⊕<br>○<br>○<br>Low | IMPORTANT  |
| Biochemical pregnancy rate |                   |              |                      |              |                           |                      |                 |                        |                         |                                               |                     |            |
| 4                          | randomised trials | not serious  | not serious          | not serious  | not serious               | none                 | 163/340 (47.9%) | 84/333 (25.2%)         | RR 1.91 (1.54 to 2.37)  | 230 more per 1000 (from 136 more to 346 more) | ⊕⊕<br>⊕⊕<br>High    | CRITICAL   |
| Clinical pregnancy rate    |                   |              |                      |              |                           |                      |                 |                        |                         |                                               |                     |            |
| 8                          | randomised trials | not serious  | not serious          | not serious  | not serious               | strong association   | 203/470 (43.2%) | 92/463 (19.9%)         | RR 2.16 (1.75 to 2.67)  | 230 more per 1000 (from 149 more to 332 more) | ⊕⊕<br>⊕⊕<br>High    | CRITICAL   |
| Live birth rate            |                   |              |                      |              |                           |                      |                 |                        |                         |                                               |                     |            |
| 4                          | randomised trials | not serious  | serious <sup>b</sup> | not serious  | very serious <sup>c</sup> | strong association   | 92/281 (32.7%)  | 18/282 (6.4%)          | RR 3.67 (1.10 to 12.23) | 170 more per 1000 (from 6 more to 717 more)   | ⊕⊕<br>○<br>○<br>Low | CRITICAL   |
| Miscarriage rate           |                   |              |                      |              |                           |                      |                 |                        |                         |                                               |                     |            |
| 4                          | randomised trials | not serious  | not serious          | not serious  | very serious <sup>d</sup> | none                 | 11/155 (7.1%)   | 8/148 (5.4%)           | RR 1.36 (0.59 to 3.17)  | 19 more per 1000 (from 22 fewer to 117 more)  | ⊕⊕<br>○<br>○<br>Low | CRITICAL   |

a: Optimal information size is not met and the 95% CI of the RR included RR of 1.25; b: High heterogeneity across studies; c: Optimal information size is not met, wide range of 95%CI and the 95% CI of the RR included RR of 1.25; d: Optimal information size is not met, wide range of 95% CI and the 95% CI of the RR included RR of 0.75 and 1.25; CI: confidence interval; RR: risk ratio.

**Table S4.** Summary of the quality assessment by GRADE approach of outcomes included in the meta-analysis of Thin Endometrium patients.

| Certainty Assessment       |                   |                      |                      |              |                           |                      | No of Patients |                        | Effect                 |                                               | Certainty             | Importance |  |
|----------------------------|-------------------|----------------------|----------------------|--------------|---------------------------|----------------------|----------------|------------------------|------------------------|-----------------------------------------------|-----------------------|------------|--|
| No of Studies              | Study Design      | Risk of Bias         | Inconsistency        | Indirectness | Imprecision               | Other Considerations | PRP            | Conventional Treatment | Relative (95% CI)      | Absolute (95% CI)                             |                       |            |  |
| Biochemical pregnancy rate |                   |                      |                      |              |                           |                      |                |                        |                        |                                               |                       |            |  |
| 2                          | randomized trials | Serious <sup>a</sup> | serious <sup>b</sup> | not serious  | serious <sup>c</sup>      | None                 | 26/70 (37.1%)  | 10/73 (13.7%)          | RR 1.97 (1.57 to 2.48) | 133 more per 1000 (from 78 more to 203 more)  | ⊕○○○<br>○<br>very low | CRITICAL   |  |
| Clinical pregnancy rate    |                   |                      |                      |              |                           |                      |                |                        |                        |                                               |                       |            |  |
| 2                          | randomized trials | serious <sup>a</sup> | serious <sup>b</sup> | not serious  | serious <sup>c</sup>      | strong association   | 23/70 (32.9%)  | 7/73 (9.6%)            | RR 3.46 (1.58 to 7.59) | 236 more per 1000 (from 56 more to 632 more)  | ⊕⊕○○<br>○<br>Low      | CRITICAL   |  |
| Live birth rate            |                   |                      |                      |              |                           |                      |                |                        |                        |                                               |                       |            |  |
| 1                          | randomized trials | serious <sup>a</sup> | not serious          | not serious  | very serious <sup>d</sup> | none                 | 11/40 (27.5%)  | 6/43 (14.0%)           | RR 1.97 (0.80 to 4.83) | 135 more per 1000 (from 28 fewer to 534 more) | ⊕○○○<br>○<br>very low | CRITICAL   |  |
| Miscarriage rate           |                   |                      |                      |              |                           |                      |                |                        |                        |                                               |                       |            |  |
| 1                          | randomized trials | serious <sup>a</sup> | not serious          | not serious  | very serious <sup>e</sup> | none                 | 3/40 (7.5%)    | 2/43 (4.7%)            | RR 1.61 (0.28 to 9.16) | 28 more per 1000 (from 33 fewer to 380 more)  | ⊕○○○<br>○<br>very low | CRITICAL   |  |

a: One study with unclear risk of bias; b: high heterogeneity across studies; c: optimal information size is not met; d: optimal information size is not met and the 95% of the RR included a RR value of 1.25; e: optimal information size is not met, wide range of the 95% CI of the RR and the 95% of the RR included a RR value of 0.75 and 1.25; CI: confidence interval; RR: risk ratio.

## References

- Chang, Y.; Li, J.; Chen, Y.; Wei, L.; Yang, X.; Shi, Y.; Liang, X. Autologous Platelet-Rich Plasma Promotes Endometrial Growth and Improves Pregnancy Outcome during in Vitro Fertilization. *Int. J. Clin. Exp. Med.* **2015**, *8*, 1286–1290.
- Tandulwadkar, S.R.; Naralkar, M.V.; Surana, A.D.; Selvakarthick, M.; Kharat, A.H. Autologous Intrauterine Platelet-Rich Plasma Instillation for Suboptimal Endometrium in Frozen Embryo Transfer Cycles: A Pilot Study. *J. Hum. Reprod. Sci.* **2017**, *10*, 208–212.
- Zadehmodarres, S.; Salehpour, S.; Saharkhiz, N.; Nazari, L. Treatment of thin endometrium with autologous platelet-rich plasma: A pilot study. *JBRA Assist. Reprod.* **2017**, *21*, 54–56.
- Colombo, G.V.L.; Fanton, V.; Sosa, D.; Criado Scholz, E.; Lotti, J.; Aragona, S.E.; Lotti, T. Use of platelet rich plasma in human infertility. *J. Biol. Regul. Homeost. Agents* **2017**, *31*, 179–182.
- Molina, A.; Sánchez, J.; Sánchez, W.; Vielma, V. Platelet-rich plasma as an adjuvant in the endometrial preparation of patients with refractory endometrium. *JBRA Assist. Reprod.* **2018**, *22*, 42–48.
- Wang, X.; Liu, L.; Mou, S.; Zhao, H.; Fang, J.; Xiang, Y.; Zhao, T.; Sha, T.; Ding, J.; Hao, C. Investigation of Platelet-Rich Plasma in Increasing Proliferation and Migration of Endometrial Mesenchymal Stem Cells and Improving Pregnancy Outcome of Patients with Thin Endometrium. *J. Cell. Biochem.* **2018**, *120*, 7403–7411. <https://doi.org/10.1002/jcb.28014>.

7. Coksuer, H.; Akdemir, Y.; Ulas Barut, M. Improved in Vitro Fertilization Success and Pregnancy Outcome with Autologous Platelet-Rich Plasma Treatment in Unexplained Infertility Patients That Had Repeated Implantation Failure History. *Gynecol. Endocrinol.* **2019**, *35*, 815–818. <https://doi.org/10.1080/09513590.2019.1597344>.
8. Kim, H.; Shin, J.E.; Koo, H.S.; Kwon, H.; Choi, D.H.; Kim, J.H. Effect of Autologous Platelet-Rich Plasma Treatment on Refractory Thin Endometrium During the Frozen Embryo Transfer Cycle: A Pilot Study. *Front. Endocrinol.* **2019**, *10*, 61. <https://doi.org/10.3389/fendo.2019.00061>.
9. Chang, Y.; Li, J.; Wei, L.N.; Pang, J.; Chen, J.; Liang, X. Autologous platelet-rich plasma infusion improves clinical pregnancy rate in frozen embryo transfer cycles for women with thin endometrium. *Medicine* **2019**, *98*, e14062. <https://doi.org/10.1097/MD.00000000000014062>.
10. Aghajanzadeh, F.; Esmaeilzadeh, S.; Basirat, Z.; Mahouti, T.; Heidari, F.N.; Golsorkhtabaramiri, M. Using Autologous Intrauterine Platelet-Rich Plasma to Improve the Reproductive Outcomes of Women with Recurrent Implantation Failure. *JBRA Assist. Reprod.* **2020**, *24*, 30–33. <https://doi.org/10.5935/1518-0557.20190055>.
11. Maleki-Hajiagha, A.; Razavi, M.; Rouholamin, S.; Rezaeinejad, M.; Maroufizadeh, S.; Sepidarkish, M. Intrauterine Infusion of Autologous Platelet-Rich Plasma in Women Undergoing Assisted Reproduction: A Systematic Review and Meta-Analysis. *J. Reprod. Immunol.* **2020**, *137*, 103078. <https://doi.org/10.1016/j.jri.2019.103078>.
12. Frantz, N.; Ferreira, M.; Kulmann, M.I.; Frantz, G.; Bos-Mikich, A.; Oliveira, R. Platelet-Rich plasma as an effective alternative approach for improving endometrial receptivity—A clinical retrospective study. *J. Bras. Reprod. Assist* **2020**, *24*, 442–446. <https://doi.org/10.5935/1518-0557.20200026>.
13. Tehraninejad, E.S.; Kashani, N.G.; Hosseini, A.; Tarafdari, A. Autologous platelet-rich plasma infusion does not improve pregnancy outcomes in frozen embryo transfer cycles in women with history of repeated implantation failure without thin endometrium. *J. Obstet. Gynaecol. Res.* **2021**, *47*, 147–151.
14. Godha, Z.; Nayar, K.D.; Gupta, S.; Singh, M.; Gupta, M.; Kant, G.; Nayar, K. Randomized controlled trial of intrauterine infusion of autologous platelet rich plasma (PRP) versus granulocyte colony stimulating factor (G-CSF) in thin endometrium in frozen embryo transfer. In *Human Reproduction*; Oxford Univ Press; Oxford, UK, 2019; Volume 34, p. 277.
